# Supplementary material
Source: PubMed Central journal article supplement (PMC3184252)
Supplement: NIHMS314872-supplement-1.pdf [file NIHMS314872-supplement-1.pdf]

| Supplementary Data 1. Primer Sequence for quantitative RT-PCR |                                |                               |
|---------------------------------------------------------------|--------------------------------|-------------------------------|
|                                                               | Forward                        | Reverse                       |
| AR                                                            | ATCCTCATATGGCCAGTGTCAAG        | GCTCTCTAAACTTCCCGTGGCATA      |
| ARV <sup>7</sup>                                              | CCATCTTGTCGTCTTCGGAAATGTTATGAA | TTTGAATGAGGCAAGTCAGCCTTTCT    |
| AR <sup>del567es</sup>                                        | TGCTGGACACGACAACAA             | GCAGCTCTCTCGCAATCA            |
| PSA                                                           | GCATGGGATGGGGATGAAGTAAG        | CATCAAATCTGAGGGTTGTCTGGA      |
| NKX3.1                                                        | AACCATTTACCCAGACAGCCT          | TGTGACAGATTGGAGCAGGGTT        |
| FKBP5                                                         | AAAAGGCCACCTAGCTTTTTGC         | CCCCCTGGTGAACCATAATACA        |
| TMPRSS2                                                       | AGCAGGCTGGTTTGCAAGAA           | CAGACGGATCCTGCAAATGG          |
| SR-B1                                                         | CCTCACAGGGTCCCTCAGATTAT        | TTCCAGTAGAAAAGGGTACAGG        |
| LDLR                                                          | TTGCCTCTGAAATGCCTCTTCT         | ATCATTCTCCCAAAAAGCGTTG        |
| STAR                                                          | CAGTGGGTGCCTCCAGAAATA          | TGACTGGTGCCTATGAAAGCAA        |
| STARD3                                                        | GAAAGAGTCTGGGACCCTTGTTG        | CCTGGGAGAGGCAGAGATTCAT        |
| STARD4                                                        | GCCTGCTGTATCTTCCATGTCTT        | TCTGATGTTTCTTCTACACTCAAGTCC   |
| STARD5                                                        | AGAGACCACGTTTCCCTGACTG         | GAGGGAGCGGTACATGCTTAAA        |
| LIPE                                                          | CACACAGATGCCCTCTACTCC          | CAGGCTCTTGAGCATGCTGTC         |
| SCAP                                                          | GGACCTAAACTACGGGGACCTG         | CACTGCCAAAGTTGCAGACAAT        |
| CYP11A1                                                       | CTGCATCTTCAGTCGTCTGTCC         | GGTGACCACTGAGAACCCATTC        |
| CYP17A1                                                       | ACCTGGAGGTGCCAGATGAT           | GGCGCACCTTGATCTTCACT          |
| CYB5A                                                         | AGATTCAGAAGCACAACCACAGC        | TTAAAACCTTCTCCACCAGGA         |
| POR                                                           | CAGCCCCTCCACGTGATT             | ACAGAAAACAGAACTTTATTCCAAGG    |
| CYP3A5                                                        | CTGGACAGAGCCTGAGGAGTTC         | ACCTCATGCCAATGCAGTTTCT        |
| DAX1                                                          | AACACACCAGGATGACGCAC           | CGATGATGGGCCTGAAGAAC          |
| SF-1                                                          | CTTCAAGGAGCTGGAGGTG            | AGGATGCTGCCCTCCTTG            |
| HNF1A                                                         | TCCTGTATTTGTTCCCAAGAGCA        | AGGCTCCCACAGGAGTAAGGAC        |
| HNF4A                                                         | GTCTCCCTGGATCAGAACAGGA         | TTGATCACGGTGAGAACACAGG        |
| DUSP1                                                         | GAGGAAGGGTGTGGTCCACTG          | ATCCAGCTTGACTCGGTTAGTCC       |
| HSD3B1                                                        | CCATGTGGTTTGCTGTTACCAA         | TCAAAACGACCCTCAAGTTAAAAGA     |
| HSD3B2                                                        | CTGCTGCCTCTCTTTCACACAA         | AGAAAGTTCTGGTTGGGCCAGT        |
| HSD17B3                                                       | CTGAAGCTCAACACCAAGGTCA         | CTGCTCCTCTGGTCCTCTTTCAG       |
| AKR1C3                                                        | GAGAAGTAAAGCTTTGGAGGTCACA      | CAACCTGCTCCTCATTATTGTATAAATGA |
| SDR5A1                                                        | CCTGTTGAATGCTTCATGACTTG        | TAAGGCAAAGCAATGCCAGATG        |
| SDR5A2                                                        | CTCTCTAAGGAAGGGGCCGAAC         | GACAATGCATTCCGCAAACATA        |
| AKR1C2                                                        | CCTAAAAGTAAAGCTCTAGAGGCCGT     | GAAAATGAATAAGATAGAGGTCAACATAG |
| RODH4                                                         | GACCGGTCCAGTCCAGAGGTC          | TAGCGAGTACGGGGGTGGCAG         |
| RODH5                                                         | GAGGCCTTCTCTGACAGCCTGAG        | CCATAGTGGGCCTGTGTGGCA         |
| RL-HSD (HSD17B6)                                              | GCTTTCTTTGTAGGAGGCTACTGTG      | TCCTTAATATGCTTGGGGGCTTCT      |
| HSD17B10                                                      | GGCATGACACTGCCATTG             | GGTCACCCAGTCGGCTAGG           |
| NT 3 $\alpha$ -HSD (DHRS9)                                    | CCAAGTTGGGGAGAAAGGTCT          | CACTGGAGACATTAATAACTCTCC      |
| UGDH                                                          | CCCTTTGATACTTGTGCTCTGC         | CCCTCTTCTCATTGAACTGCAAA       |
| UGT2B15                                                       | CGTTGTGCACATGTACCCTAAAA        | CCATGTTACATTTTCTTCTG          |
| UGT2B17                                                       | AAGCCTGAAGTGAATGACCAA          | TTTTGTGCGCAGGAAAAGGAAA        |
| RPL13A                                                        | CCTGGAGGAGAAGAGGAAAGAGA        | TTGAGGACCTCTGTGTATTTGTCAA     |
